# Supplementary material
Source: publisher site journal article supplement (https://www.spandidos-publications.com/3261/downloadSupplementary)

Figure S1. Number of cells positive for CD11c, CD163 and CD206 in the endometrial epithelium-infiltrating stroma. (A) Number of antibody-positive cells around the infiltrated epithelium in (A) patient no. 1, (B) patient no. 2 and (C) patient no. 3. The data are shown as the mean  $\pm$  SD in 10 fields of view.

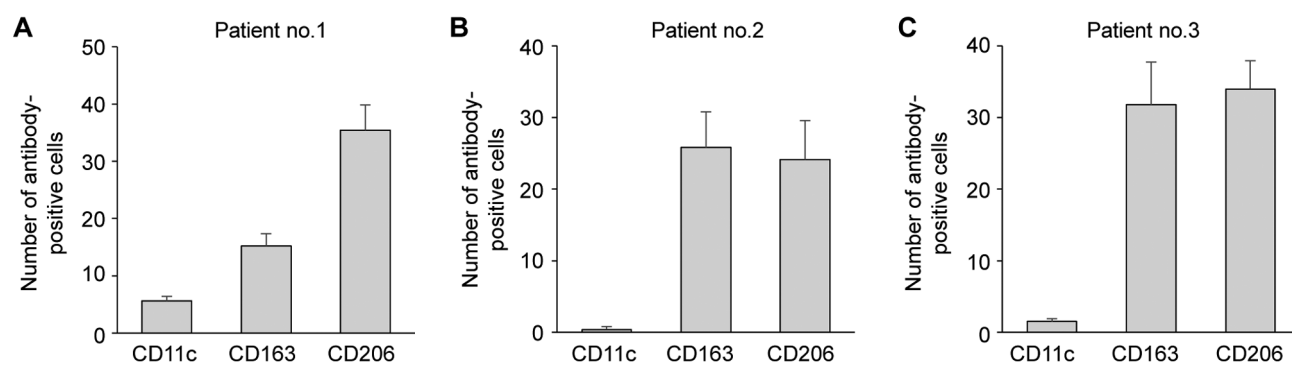

Figure S2. Endometrial epithelium and ovarian follicle infiltrated by OE stroma. CD10 staining of (A) ovarian follicle and (B) endometrial stroma. (C) Keratin-stained epithelium of ovarian follicle. Magnification, x400. Scale bar, 50  $\mu$ m. OE, ovarian endometrioma.

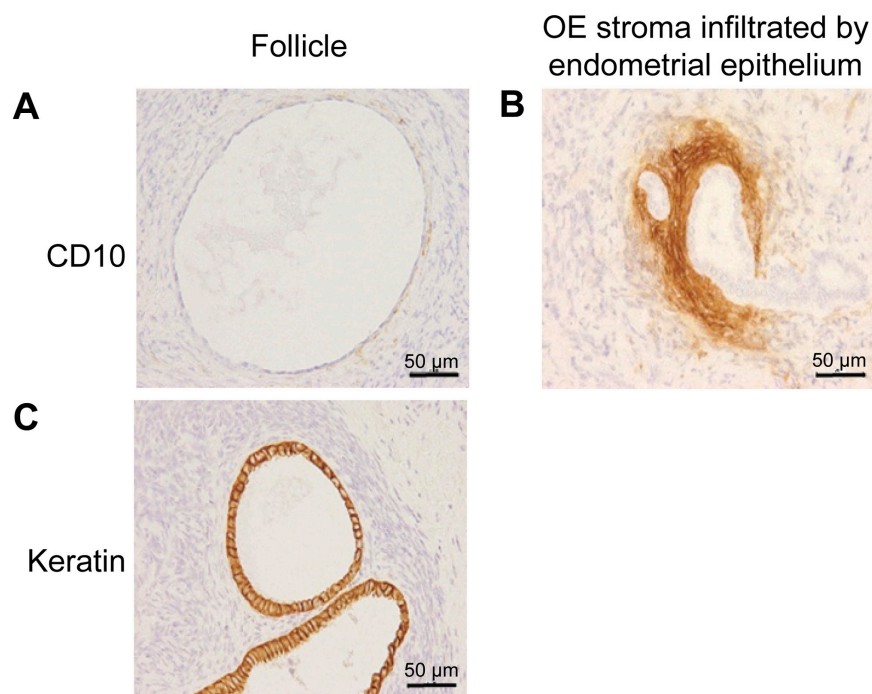

Supplement: Supplementary file 1 [file downloadSupplementary]
